# Supplementary material for: Red and far-red light contrastingly influence storage root development and gene expression profile in radish (Raphanus sativus L.)
Source: Research Square preprint supplement (doi:10.21203/rs.3.rs-7318257/v1), 2025-08-14
Supplement: Supplementary file 1 [file 9f8a1f08c8954257d5e018e7.docx]

Table S1. List of ‘common’ differentially expressed genes (DEGs) which showed a common pattern of expression changes in both radish leaves and roots at 28 and 42 days after germination (DAG) under the red light (RL) in comparison with far-red light (FRL)*.

| ID of protein product (NCBI) | Function of protein product  (NCBI) | log2 fold change | | | |
| --- | --- | --- | --- | --- | --- |
| leaf | | root | |
| 14 DAG | 28 DAG | 14 DAG | 28 DAG |
| Downregulated under RL (13 genes total) | | | | | |
| KAJ4887868.1 | Pseudo-response regulator APRR5 | -2.5261825183565 | -1.0140043121755 | -1.6406116213069 | -1.4550644855772 |
| KAJ4906650.1 | MADS-box protein SOC1 | -5.2622803220849 | -2.4812987476026 | -9.8076595531523 | -6.4464590164298 |
| KAJ4870594.1 | MADS-box protein SOC1 | -2.5784701487719 | -2.0889691325272 | -2.3417979517550 | -7.9712641057570 |
| KAJ4911149.1 | Protein CONSTANS-LIKE5 | -4.1853867341983 | -2.1863289415179 | -2.7276134530199 | -1.6265456869011 |
| KAJ4880546.1 | Xyloglucan endotransglucosylase/hydrolase | -3.1911331872392 | 0 | -3.1270545484161 | -1.5838549856894 |
| KAJ4901395.1 | Tonoplast dicarboxylate transporter | -4.5209908499064 | 0 | -4.9542433984130 | 0 |
| KAJ4874343.1 | Vacuolar membrane proton pump | -1.3445558495921 | 0 | -2.5590331964105 | -2.3093047861529 |
| KAJ4884228.1 | Putative carboxylesterase | -1.0613655605887 | 0 | -1.7883564988240 | -2.3921912858641 |
| Upregulated under RL (4 genes total) | | | | | |
| KAJ4879121.1 | Two-component response regulator ARR4 | 1.19102447737697 | 3.57139246675224 | 1.61379171504291 | 2.05062510794951 |
| KAJ4871578.1 | Myrosinase 1 | 1.29636461429848 | 10.1413888649609 | 1.78618057142299 | 1.18670983342403 |
| KAJ4881196.1 | Myrosinase 1 | 1.96032909846856 | 14.0744433470567 | 3.13288265524729 | 1.48919143962641 |
| KAJ4910175.1 | Myrosinase 1 | 1.15607238819137 | 8.82178991488416 | 1.9163683609008 | 1.43982407122758 |

* The table only shows genes with known function.


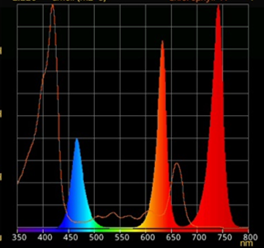

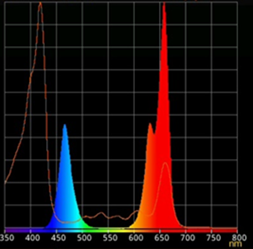


A B

Figure S1. Light treatment spectra, relative portion of R660 and FR730 in their combination: Treatment A– 0% R660 + 100% FR730; Treatment B – 100% R660 + 0% FR730.


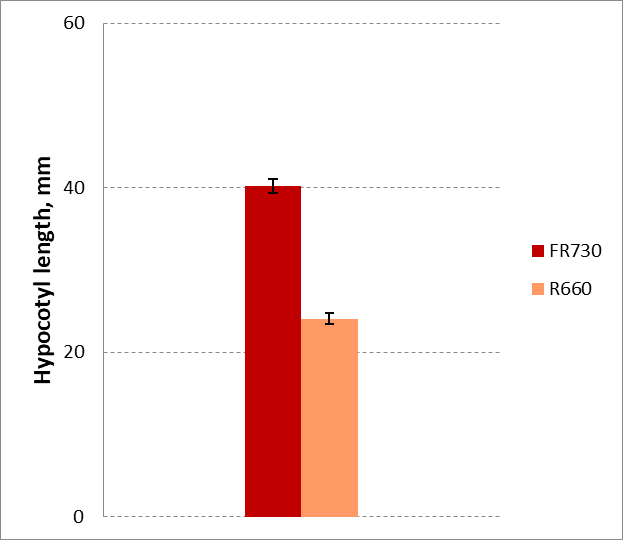

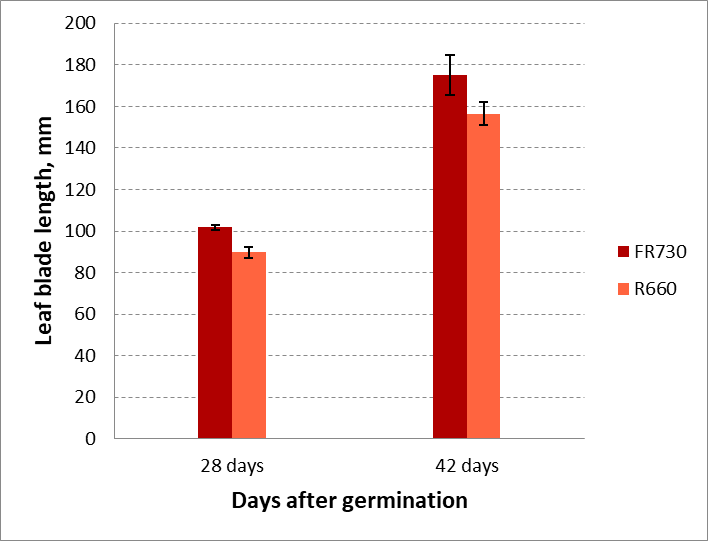


A B

Figure S2. Shade avoidance response in radish plants treated with FR730 . A – hypocotyl elongation, 11 days after germination, mm; B – the biggest leaf length, mm. Means ±standard error (SE).


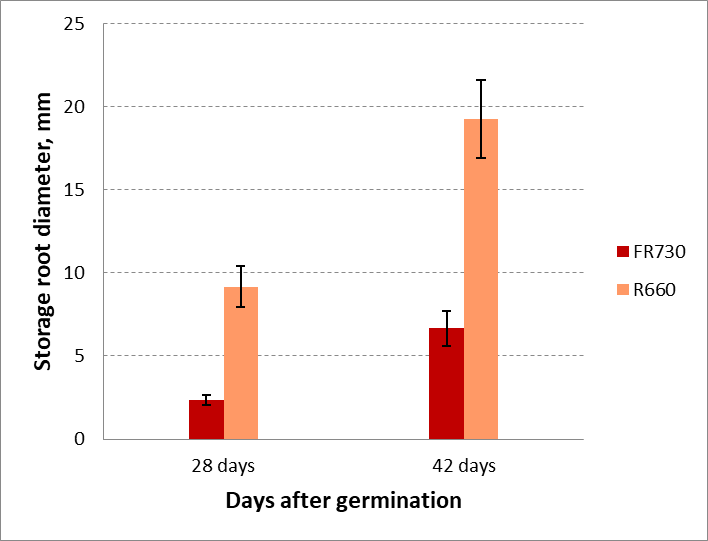

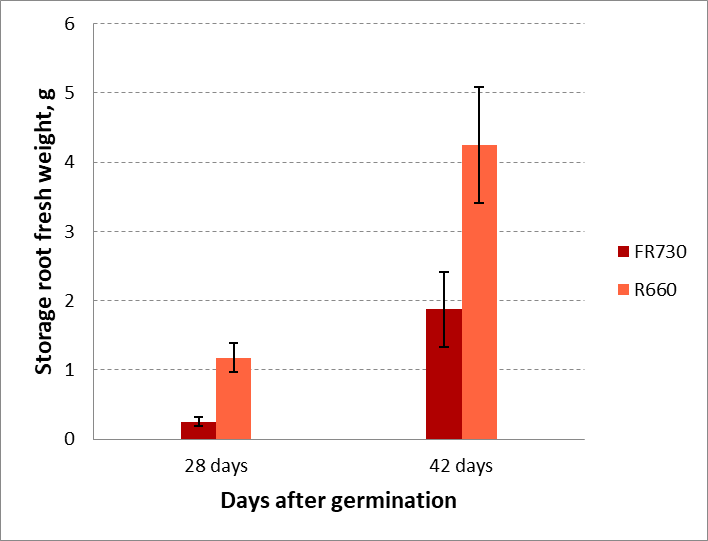


A B

Figure S3. Storage root formation in radish plants as affected by FR730 or R660 light treatment. A – storage root diameter, mm; B – storage root fresh weight. Means ± SE.


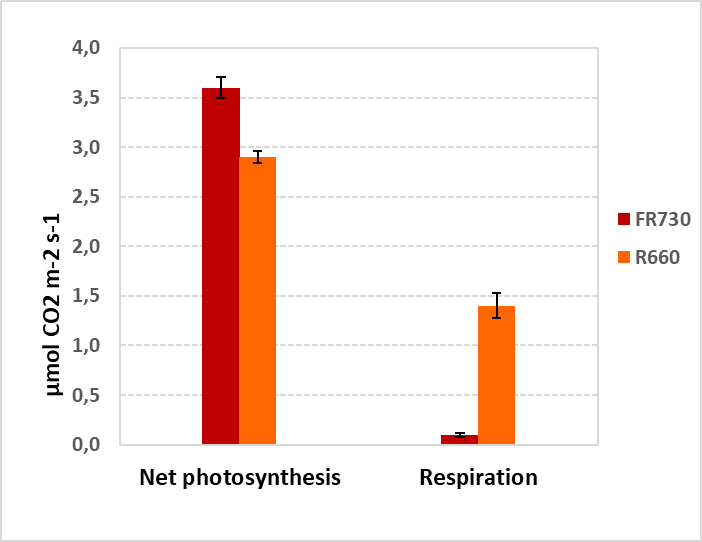


Figure S4. CO2 exchange in the leaves of radish plants as affected by FR730 or R660 light treatment, 33 DAG. Means ± SE.

Figure S5. Transverse sections through the lower part of the storage root of R. sativus corresponding to the primary root (A), middle part of the storage root corresponding to the hypocotyl (B, D – F) and the stem internode (C). D, E, storage root transverse section of R. sativus grown on R (28 DAG). Proliferation of apotracheal and vasicentric parenchyma is observed both in central part of the stele (D) and in secondary xylem (E); F, Storage root transverse section of R. sativus grown on RL (42 DAG). “Halo” of the apotracheal proliferating parenchyma is shown. app, apotracheal proliferating parenchyma; cor, cortex; cz, cambial zone; lr, lateral root; mxv, metaxylem vessel; pxv, protoxylem vessel; sc, sclerenchyma; sxv, secondary xylem vessel, vpp, vasicentric proliferating parenchyma. Scale bars, A-E 100 µm, F 50 µm.
